# Supplementary material for: MOF-derived ruthenium-doped amorphous molybdenum dioxide hybrid for highly efficient hydrogen evolution reaction in alkaline media
Source: Royal Society of Chemistry journal article supplement (doi:10.1039/d1cc05683b), 2021-11-29

Electronic Supplementary Information (ESI) for Chemical Communications  
This journal is (c) The Royal Society of Chemistry 2021

## Supporting Information

### **MOFs-derived ruthenium-doped amorphous molybdenum dioxide hybrid for highly efficient hydrogen evolution reaction in alkaline media**

Ji-Yuan Han,<sup>a</sup> Sheng-Hao Cai,<sup>a</sup> Shuang Yang,<sup>a</sup> Ji-Yu Zhu,<sup>a</sup> and Ji-Sen Li<sup>\*,a</sup>

<sup>a</sup>Department of Chemistry and Chemical Engineering, Jining University, Qufu  
273155, P. R. China.

E-mail: [senjili@sina.com](mailto:senjili@sina.com)

## Experimental Section

### Materials

Copper acetate monohydrate ( $\text{Cu}(\text{OAc})_2 \cdot \text{H}_2\text{O}$ ), phosphomolybdic acid ( $\text{H}_3\text{PMo}_{12}\text{O}_{40} \cdot n\text{H}_2\text{O}$ ), ruthenium chloride hydrate ( $\text{RuCl}_3 \cdot x\text{H}_2\text{O}$ ), 1,3,5-benzenetricarboxylic acid ( $\text{H}_3\text{BTC}$ , 98%), sodium hydroxide ( $\text{NaOH}$ ), and iron (III) chloride hexahydrate ( $\text{FeCl}_3 \cdot 6\text{H}_2\text{O}$ ) were obtained from Sinopharm Chemical Reagent Co. Ltd. Commercial Pt/C (20 wt%) was provided by Johnson Matthey. Graphene oxide (GO) was purchased from XFNANO, China. All reagents were utilized without further purification.

**Preparation of NENU-5/GO.** Different amounts of GO (10, 20, and 40 mg) were dispersed into 10 mL of distilled water by ultrasonication for 2 h, respectively. Then, 0.2 g of  $\text{Cu}(\text{OAc})_2 \cdot \text{H}_2\text{O}$  and 0.17 g of  $\text{H}_3\text{PMo}_{12}\text{O}_{40} \cdot n\text{H}_2\text{O}$  were added into the above solution and stirred for 30 min to form solution A. The pH of A was changed into 4.0 with the assistance of  $\text{NaOH}$ . 0.14 g of  $\text{H}_3\text{BTC}$  was dissolved in ethanol solution (40 mL) to form solution B, which was added into the solution A with vigorously stirring. Finally, the product was collected, washed with alcohol/water, and dried at 50 °C for 12 h, which were denoted as NENU-5/GO (10, 20, and 40 mg), respectively.

In control experiment, NENU-5 was prepared with the identical method except for the addition of GO.

**Preparation of  $\text{RuCl}_3$ -NENU-5/GO.** In a typical procedure, 0.1 g of the resulting NENU-5/GO (10, 20, and 40 mg) were dispersed into 80 mL of the mixed solution ( $V_{\text{ethanol}} : V_{\text{water}} = 1:1$ ) to achieve a uniform suspension, respectively, and then 60  $\mu\text{L}$  of  $\text{RuCl}_3 \cdot x\text{H}_2\text{O}$  solution (10 mg  $\text{mL}^{-1}$ ) was added the above solution. After continuous stirring for 12 h, the products were filtered, washed with water and dried at 50 °C, which were defined as  $\text{RuCl}_3$ -NENU-5/GO (10, 20, and 40 mg), respectively.

For comparison,  $\text{RuCl}_3$ -NENU-5 was also synthesized *via* the same processes for  $\text{RuCl}_3$ -NENU-5/GO.

**Preparation of  $\text{Ru-MoO}_2$ @PC/rGO.** The resultant  $\text{RuCl}_3$ -NENU-5/GO (20 mg) was carbonized at 600 °C under Ar for 5 h, and then etched by  $\text{FeCl}_3$  solution (0.1 M) for 12 h. After washed with water, the obtained sample was denoted as  $\text{Ru-MoO}_2$ @PC/rGO.

In addition, Ru-MoO<sub>2</sub>@PC/rGO (10 and 40), MoO<sub>2</sub>@PC, and Ru-MoO<sub>2</sub>@PC were obtained from RuCl<sub>3</sub>-NENU-5/GO (10 and 40 mg), NENU-5 and Ru-NENU-5 through the similar way to Ru-MoO<sub>2</sub>@PC/rGO, respectively.

**Instruments.** The structural and morphological features of the as-synthesized nanomaterials were analyzed by scanning electron microscope (JSM-7600F, JEOL), transmission electron microscopy (JEOL-2100F, JEOL), powder X-Ray diffraction (D/max 2500VL/PC, Japan), gas sorption analyzer (ASAP 2050, Micromeritics), X-ray photon spectroscopy (PHI 5000 Versa Probe, ULAC-PHI), respectively.

**Electrochemical measurements.** The electrocatalytic HER properties were investigated in a typical three-electrode setup on a CHI 760E in 1.0 M KOH solution. 4 mg of the designed catalyst and 60  $\mu$ L of nafion solution (5 wt%) were uniformly dispersed in 1940  $\mu$ L of ethanol by continuously sonicating for at least 30 min. Subsequently, 5  $\mu$ L of the ink was decorated on a glassy carbon electrode (GCE, 0.14 mg cm<sup>-2</sup>). For comparison, commercial Pt/C (20 wt%) catalyst was also prepared with the same method. An Hg/HgO and graphite rod were utilized as the reference and counter electrode, respectively. Noticeably, the Hg/HgO electrode was calibrated in H<sub>2</sub>-saturated 1.0 M KOH solution, where the Pt foil was used as the working and counter electrode, respectively (Fig. S20, EIS<sup>†</sup>).  $E_{\text{RHE}} = 0.924 \text{ V} + E_{\text{Hg/HgO}}$ .

Additionally, cyclic voltammetry (CV) at a sweep rate of 100 mV s<sup>-1</sup> and linear sweep voltammetry (LSV) at 5 mV s<sup>-1</sup> were carried out, respectively. In this work, the potentials were corrected with 95% iR drop compensation. The double-layer capacitor ( $C_{\text{dl}}$ ) was assessed using CVs at 20-100 mV s<sup>-1</sup> in the region of 24-124 mV.

To investigate the stability at a large current density, the obtained catalyst was also loaded on carbon cloth (1\*1 cm<sup>-2</sup>, loading amount: 1 mg cm<sup>-2</sup>).

### Computational Details

Density functional theory (DFT) calculations have been carried out using the Vienna ab-initio simulation package (VASP). The Perdew-Burke-Ernzerhof (PBE) exchange and correlation functional is chosen.<sup>1, 2</sup> To describe the interactions between valence electrons and ion cores, the Blöchl's all-electron-like projector augmented wave (PAW) method is used.<sup>3, 4</sup> The plane wave basis set kinetic cutoff energy of 450 eV with a Monkhost-Pack k-point grid of 3×3×1 are

applied.<sup>5</sup> The convergence tolerance of total energy calculation is determined at  $1.0 \times 10^{-6}$  eV/atom with ionic force minimization level of 0.01 eV/Å. A vacuum layer as large as 20 Å is used along the c direction to avoid the periodic interactions.

The Gibbs free energies for HER are calculated by utilizing the computational hydrogen electrode model<sup>6,7</sup>:

$$\Delta G = \Delta E + \Delta ZPE - T\Delta S \quad (1)$$

Where  $\Delta E$  is the energy difference of adsorption.  $\Delta ZPE$  and  $T\Delta S$  are the zero-point energy correction term and the entropy correction term, respectively. The two terms are obtained by the frequency calculation at T=300 K.<sup>8</sup> The Gibbs free energy of (H<sup>+</sup>+e<sup>-</sup>) is equivalent to the energy of 1/2 G<sub>H2</sub> in the study.

## References

- (1) J. P. Perdew, K. Burke, M. Ernzerhof, *Phys. Rev. Lett.* 1996, **77**, 3865-3868.
- (2) G. Kresse, J. Hafner, *Phys. Rev. B* 1993, **47**, 558-561.
- (3) P. E. Blöchl, *Phys. Rev. B* 1994, **50**, 17953-17979.
- (4) G. Kresse, D. Joubert, *Phys. Rev. B* 1999, **59**, 1758-1775.
- (5) H. J. Monkhorst, J. D. Pack, *Phys. Rev. B* 1976, **13**, 5188-5192.
- (6) J. K. Nørskov, J. Rossmeisl, A. Logadottir, L. Lindqvist, *J. Phys. Chem. B* 2004, **108**, 17886-17892.
- (7) Y. Jiao, Y. Zheng, M. Jaroniec, S. Z. Qiao, *J. Am. Chem. Soc.* 2014, **136**, 4394-4403.
- (8) B. Delley, *J. Chem. Phys.* 1990, **92**, 508.

## S1. Figures in Supporting Information

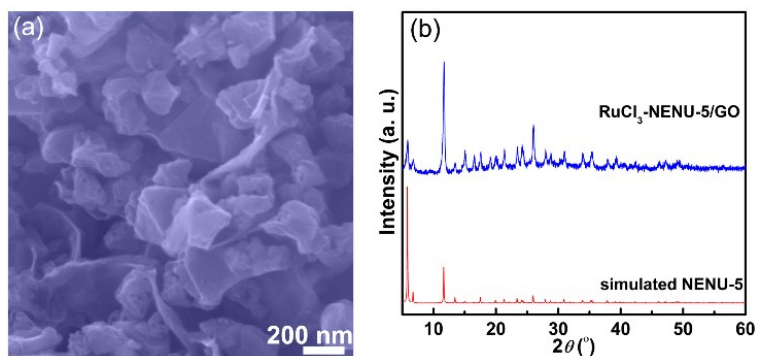

**Fig. S1** (a) SEM image and (b) PXRD pattern of RuCl<sub>3</sub>-NENU-5/GO.

In Fig. S1a, the SEM image displays that the obtained RuCl<sub>3</sub>-NENU-5 crystals with the octahedral or slightly truncated octahedral morphology, are homogeneously decorated over the GO nanosheets. The PXRD measurement was performed to examine the phase structure of RuCl<sub>3</sub>-NENU-5/GO. In Fig. S1b, the PXRD pattern of RuCl<sub>3</sub>-NENU-5/GO coincides well with simulated NENU-5, supporting that the crystal structures preserve nearly intact. Hence, these results significantly highlight the feasibility of this synthetic route.

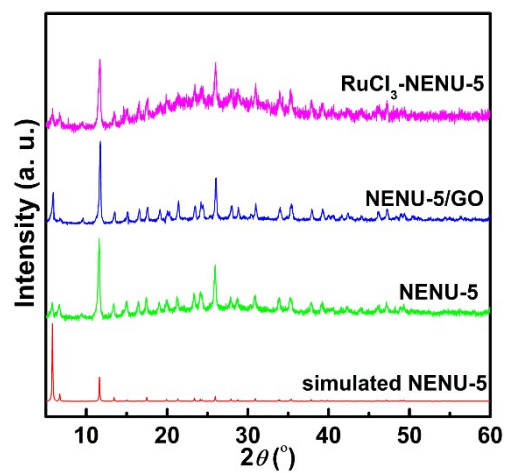

**Fig. S2** PXRD patterns of simulated NENU-5, as-synthesized NENU-5, NENU-5/GO, and RuCl<sub>3</sub>-NENU-5, respectively.

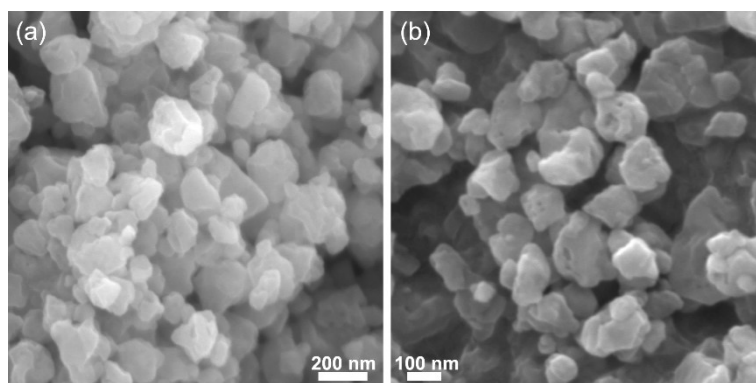

**Fig. S3** (a, b) SEM images of NENU-5.

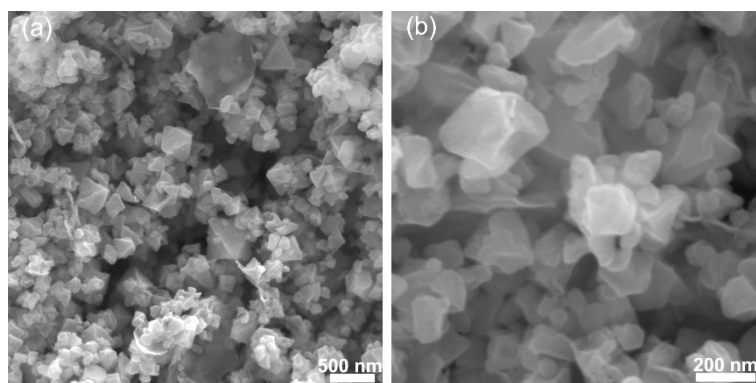

**Fig. S4** (a, b) SEM images of NENU-5/GO.



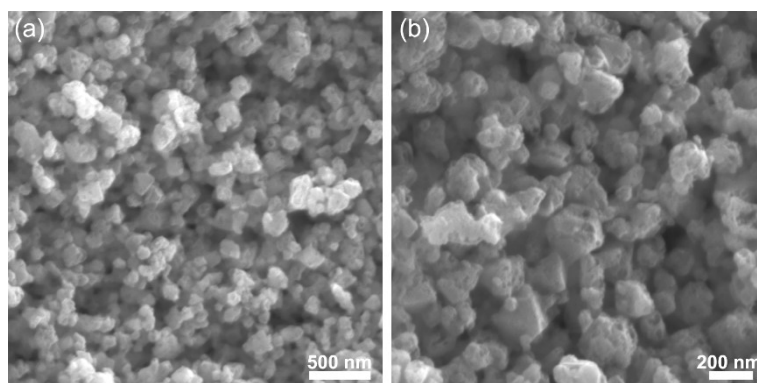

**Fig. S5** (a, b) SEM images of RuCl<sub>3</sub>-NENU-5.

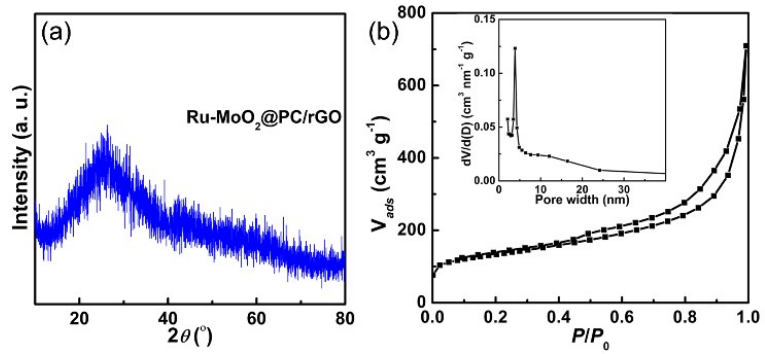

**Fig. S6** (a) PXRD pattern and (b) N<sub>2</sub> sorption isotherm of Ru-MoO<sub>2</sub>@PC/rGO. Inset of (b) is the corresponding pore size distribution.

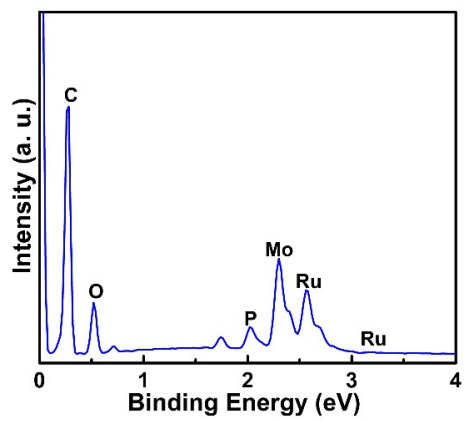

Fig. S7 EDS of Ru-MoO<sub>2</sub>@PC/rGO.

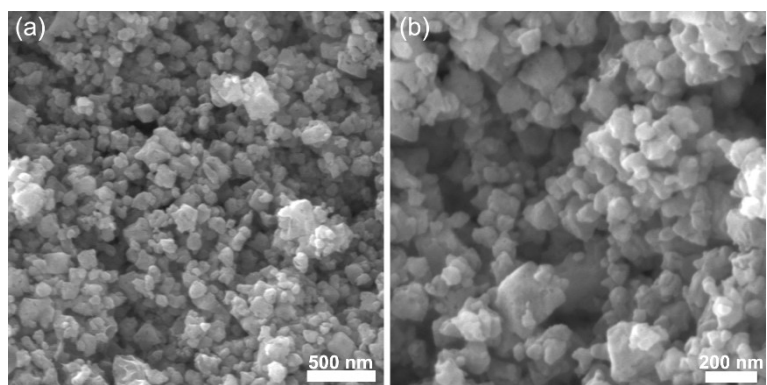

**Fig. S8** (a, b) SEM images of MoO<sub>2</sub>@PC.

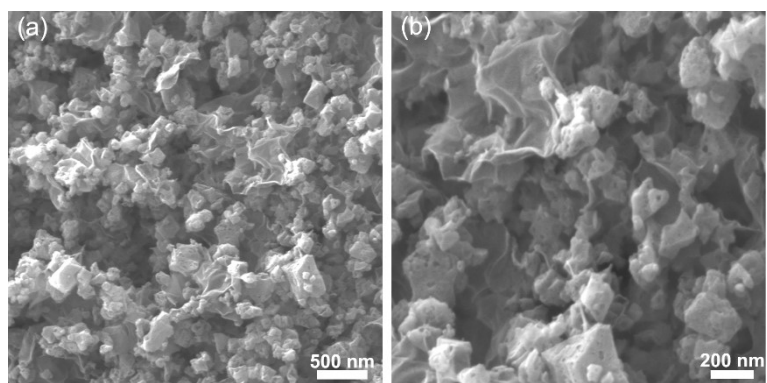

**Fig. S9** (a, b) SEM images of MoO<sub>2</sub>@PC/rGO.

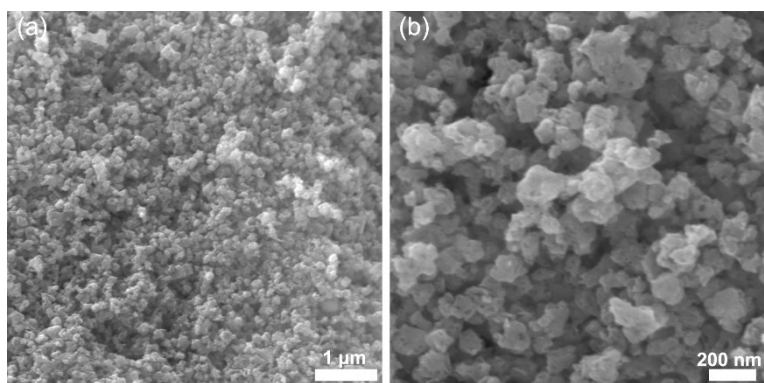

**Fig. S10** (a, b) SEM images of Ru-MoO<sub>2</sub>@PC.

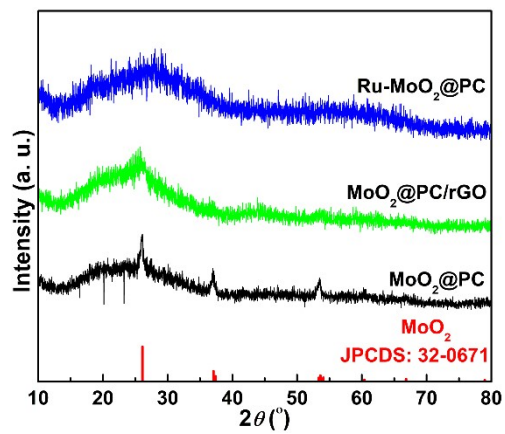

**Fig. S11** XRD patterns of MoO<sub>2</sub>@PC, MoO<sub>2</sub>@PC/rGO, and Ru-MoO<sub>2</sub>@PC, respectively.

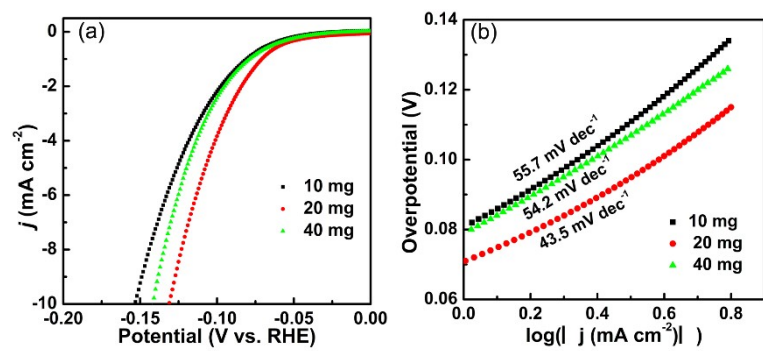

**Fig. S12** (a) Polarization curves and (b) Tafel plots of Ru-MoO<sub>2</sub>@PC/rGO with different loadings of rGO (10, 20, and 40 mg).



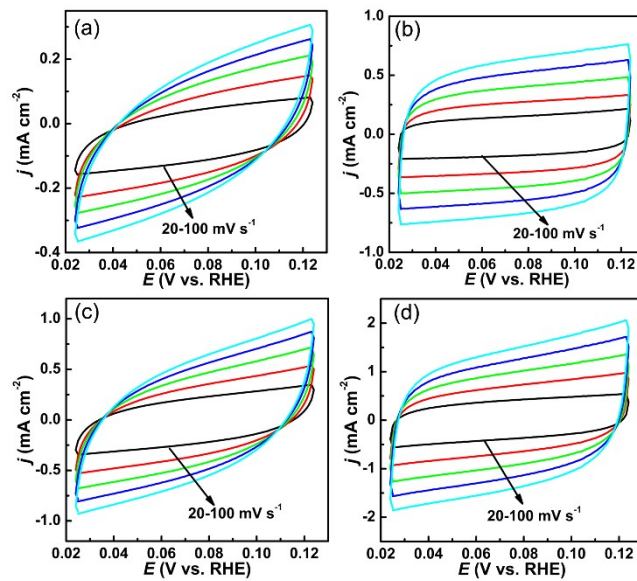

**Fig. S13** (a-d) CV curves of MoO<sub>2</sub>@PC, MoO<sub>2</sub>@PC/rGO, Ru-MoO<sub>2</sub>@PC, and Ru-MoO<sub>2</sub>@PC/rGO measured within the range of 24-124 mV vs. RHE with scan rate from 20 to 100 mV s<sup>-1</sup>, respectively.

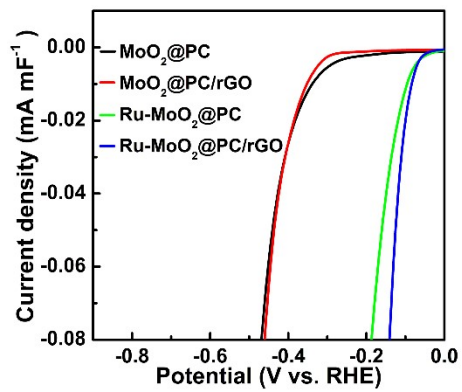

**Fig. S14** Normalized HER activities of different catalysts.

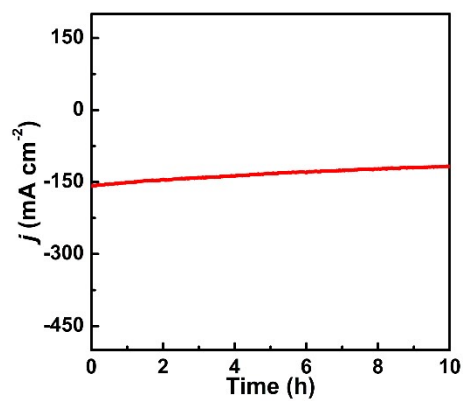

**Fig. S15** Chronopotentiometry curves of Ru-MoO<sub>2</sub>@PC/rGO at 150 mA cm<sup>-2</sup>.

As shown in Fig. S15, 80.6% of the current density could be remained during continuously operating at 150 mA cm<sup>-2</sup> for 10 h.

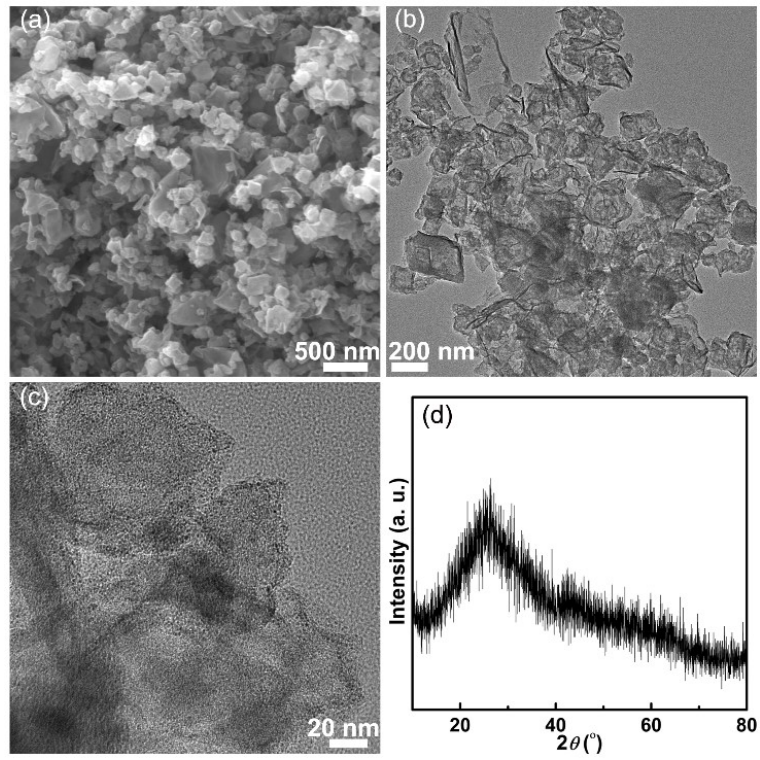

**Fig. S16** (a) SEM, (b, c) TEM images, and (d) PXRD of Ru-MoO<sub>2</sub>@PC/rGO after stability test.

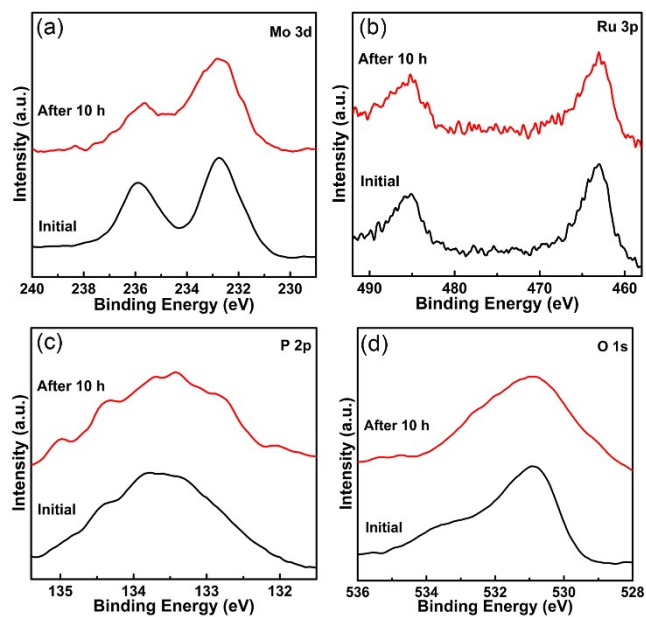

**Fig. S17** (a-d) High-resolution spectra of Mo 3d, Ru 3p, P 2p, and O 1s of Ru-MoO<sub>2</sub>@PC/rGO, after HER stability test.

“As shown in Fig. S17, the XPS analysis proves that the chemical states remain unchanged after durability tests. The contents of C, Mo, Ru, P, and O are 73.8, 2.75, 2.37, 0.62, and 20.46 at%, respectively.”

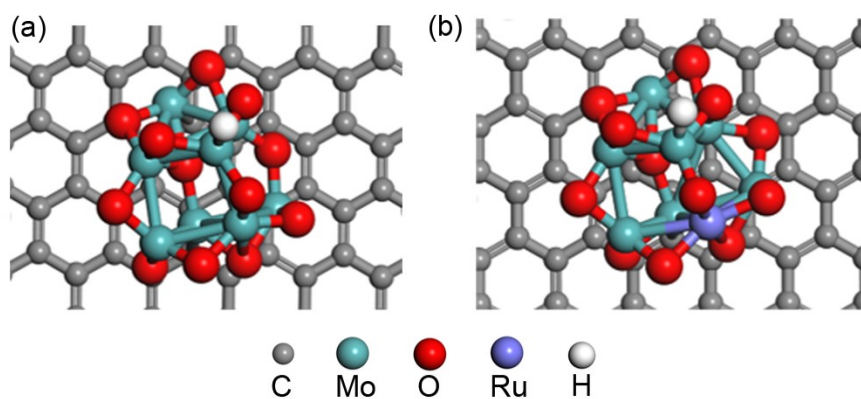

**Fig. S18** (a, b) Top views of  $\text{MoO}_2@\text{PC}/\text{rGO}$  and  $\text{Ru-MoO}_2@\text{PC}/\text{rGO}$  after optimization, where the Mo atoms are substituted by Ru atoms on the  $\text{Ru-MoO}_2@\text{PC}/\text{rGO}$ .

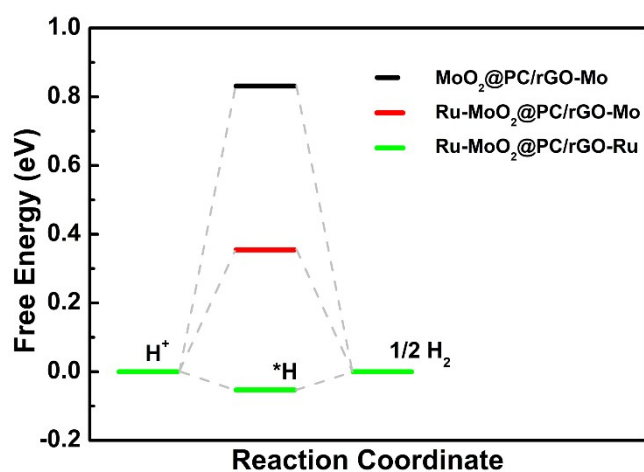

**Fig. S19** Free energy diagram on single-sites of  $\text{MoO}_2@\text{PC}/\text{rGO}$  and  $\text{Ru-MoO}_2@\text{PC}/\text{rGO}$  for HER.

“DFT calculations were performed to fundamentally comprehend into the remarkable HER performance of  $\text{Ru-MoO}_2@\text{PC}/\text{rGO}$ . As the first step of DFT calculations, we propose two rational models with three possible sites named as  $\text{MoO}_2@\text{PC}/\text{rGO-Mo}$ ,  $\text{Ru-MoO}_2@\text{PC}/\text{rGO-Mo}$ , and  $\text{Ru-MoO}_2@\text{PC}/\text{rGO-Ru}$  (Fig. S18). As is well known, the HER activity is strongly related to the Gibbs free energy of hydrogen adsorption ( $\Delta G^*_{\text{H}}$ ) on the catalysts surface. As shown in Fig. S19, the  $\Delta G^*_{\text{H}}$  for  $\text{Ru-MoO}_2@\text{PC}/\text{rGO-Ru}$ ,  $\text{Ru-MoO}_2@\text{PC}/\text{rGO-Mo}$ , and  $\text{MoO}_2@\text{PC}/\text{rGO-Mo}$  is  $-0.0534$ ,  $0.355$ , and  $0.833$  eV, respectively. The  $|\Delta G^*_{\text{H}}|$  value of  $\text{Ru-MoO}_2@\text{PC}/\text{rGO-Ru}$  closest

to zero implies the excellent behavior to adsorb hydrogen. On the basis of DFT calculations, the introduction of Ru atoms on the MoO<sub>2</sub>@PC/rGO surface can accelerate electron transfer in the catalytic process, and Ru-doping in the Mo site may boost electrocatalytic process by offering numerous active sites for HER, which significantly explains why Ru-MoO<sub>2</sub>@PC/rGO shows outstanding HER activity.”

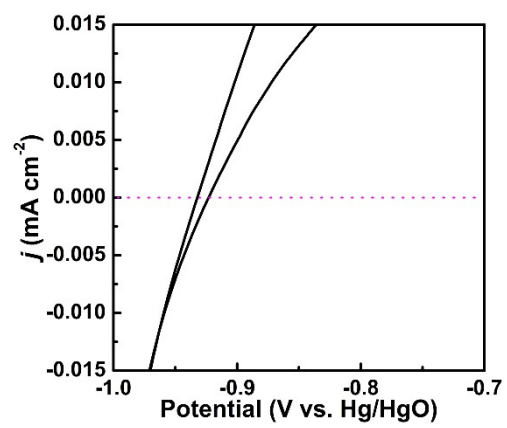

**Fig. S20** Single cycle CV curves of Hg/HgO electrode calibration in 1.0 M KOH.



## S2. Table in Supporting Information

**Table S1.** Comparison of catalytic performance of Ru-MoO<sub>2</sub>@PC/rGO and other reported materials toward HER in alkaline conditions.

| Catalysts                                                             | Tafel slope<br>[mV dec <sup>-1</sup> ] | $\eta_{10}$<br>(mV) | References                                             |
|-----------------------------------------------------------------------|----------------------------------------|---------------------|--------------------------------------------------------|
| <b>Ru-MoO<sub>2</sub>@PC/rGO</b>                                      | <b>43.5</b>                            | <b>126</b>          | <b>This work</b>                                       |
| (Ni <sub>x</sub> Fe <sub>1-x</sub> ) <sub>2</sub> P@PC/PG             | 45                                     | 242                 | <i>Adv. Funct. Mater.</i> 2021, 31, 2010912.           |
| MoO <sub>2</sub> /MoS <sub>2</sub> /C                                 | 49                                     | 91                  | <i>Adv. Funct. Mater.</i> 2021, 31, 2101715.           |
| CoP@FeCoP/NC                                                          | 56.34                                  | 141                 | <i>Chem. Eng. J.</i> 2021, 403, 126312.                |
| Ru/Co <sub>4</sub> N-CoF <sub>2</sub>                                 | 144                                    | 53                  | <i>Chem. Eng. J.</i> 2021, 414, 128865.                |
| S-CoO <sub>x</sub> /NF                                                | 80                                     | 136                 | <i>Nano Energy</i> 2020, 71, 104652.                   |
| FeCo/Co <sub>2</sub> P@NPCF                                           | 120                                    | 260                 | <i>Adv. Energy Mater.</i> 2020, 10, 1903854.           |
| MoO <sub>2</sub> -FeP@C                                               | 48                                     | 103                 | <i>Adv. Mater.</i> 2020, 32, 2000455.                  |
| Mo-Ni <sub>3</sub> S <sub>2</sub> /Ni <sub>x</sub> P <sub>y</sub> /NF | 68.4                                   | 109                 | <i>Adv. Energy Mater.</i> 2020, 10, 1903891            |
| NiFeP@C                                                               | 75.8                                   | 160                 | <i>ACS Appl. Mater. Interfaces</i> 2020, 12,<br>19447. |
| Cr-doped FeNiP/NCN                                                    | 69.5                                   | 190                 | <i>Adv. Mater.</i> 2019, 31, 1900178.                  |
| NiFeP/NCH                                                             | 125                                    | 216                 | <i>J. Am. Chem. Soc.</i> 2019, 141, 7906.              |
| Fe-CoP                                                                | 92                                     | 78                  | <i>Adv. Sci.</i> 2018, 5, 1800949.                     |
| CoP@BCN                                                               | 52                                     | 215                 | <i>Adv. Energy Mater.</i> 2017, 7, 1601671.            |

### S3. Note in Supporting Information

**Note 1.** The HER process in alkaline media can be described using the following elementary steps:

under alkaline condition:

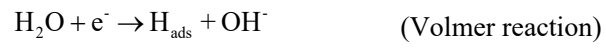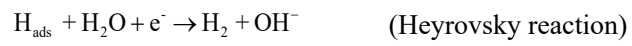

Supplement: d1cc05683b1.pdf [file d1cc05683b1.pdf]
